# Supplementary material
Source: PubMed Central journal article supplement (PMC10843106)
Supplement: NIHMS1938133-supplement-1.pdf [file NIHMS1938133-supplement-1.pdf]

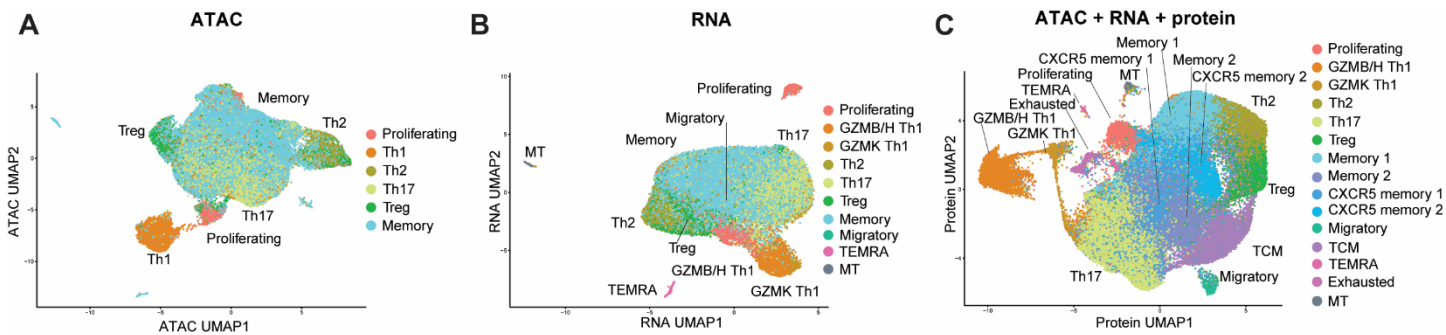

**D 3 WNN integrating ATAC + RNA + protein Annotation by ATAC**

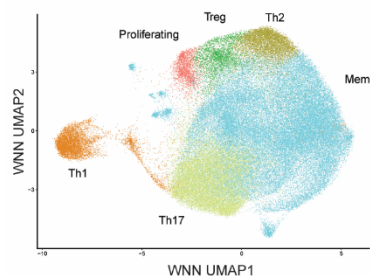

**E 3 WNN integrating ATAC + RNA + protein Annotation by RNA**

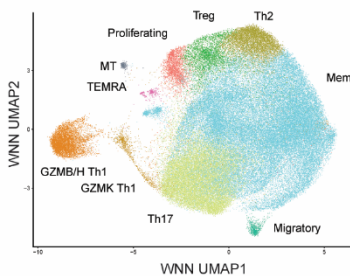

**F**

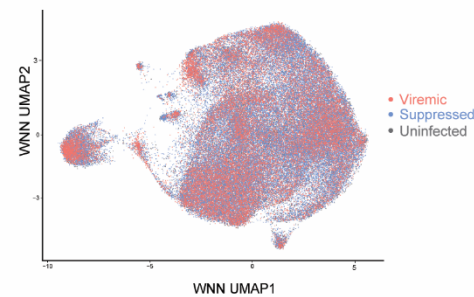

**G Annotation by ATAC**

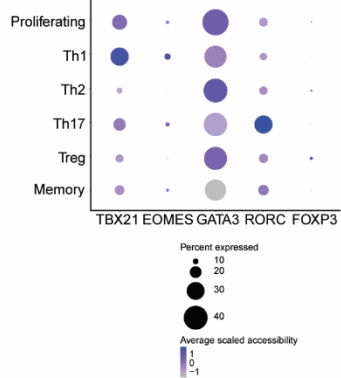

**H Annotation by RNA**

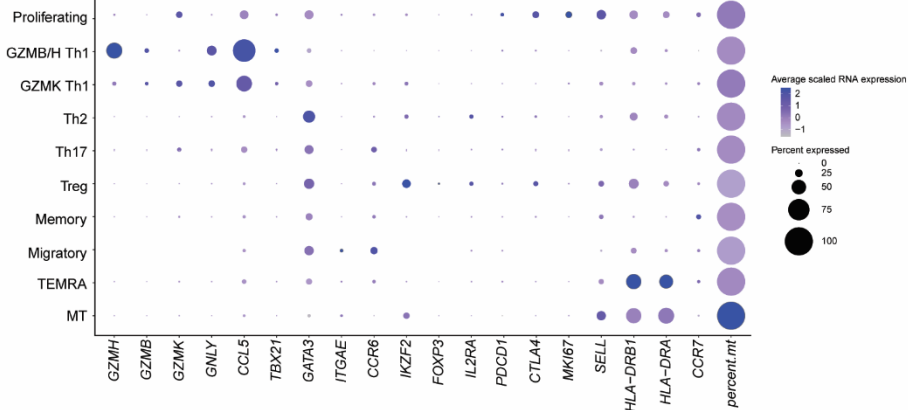

**I Annotation by protein (ADT)**

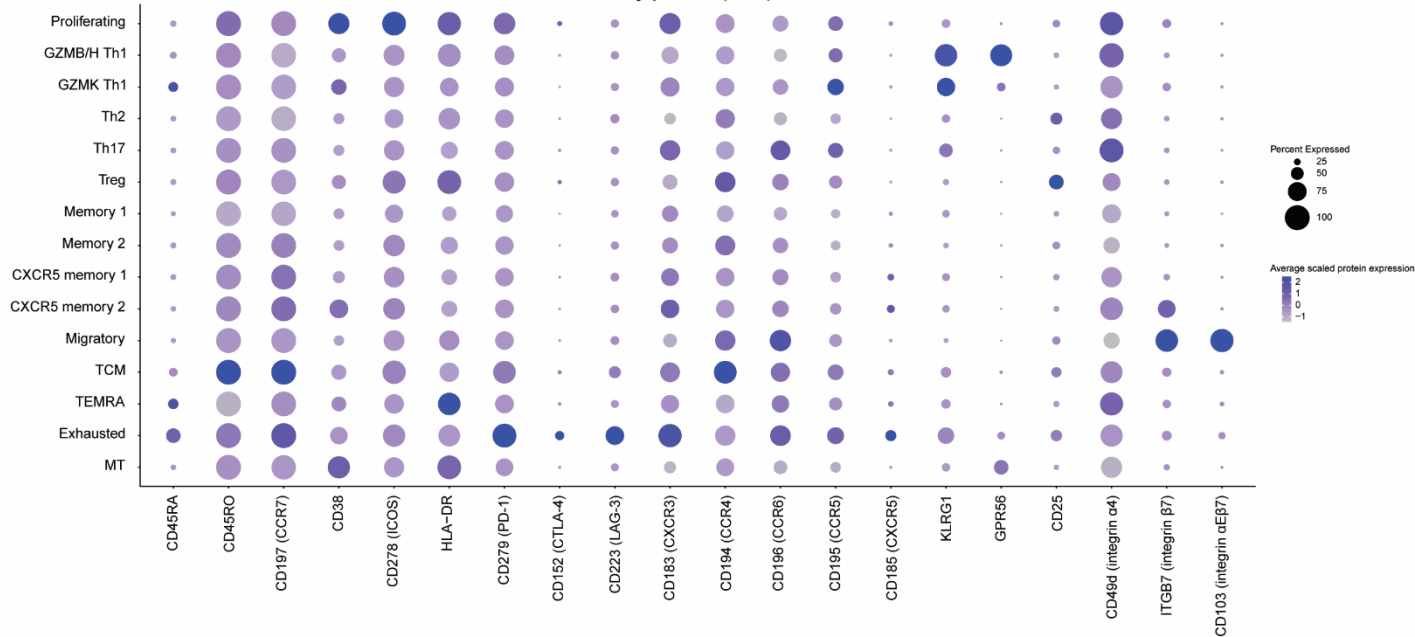

**Figure S1. Identities of memory CD4<sup>+</sup> T cell subsets were defined by epigenetic, transcriptional, and protein states, related to Figure 1. (A)** ATAC UMAP projection of memory CD4<sup>+</sup> T cells defined by chromatin accessibility profile (ATAC). **(B)** RNA UMAP projection of memory CD4<sup>+</sup> T cells defined by transcriptional profile (RNA). **(C)** Protein UMAP projection of memory CD4<sup>+</sup> T cells defined by surface protein expression profile. **(D)** WNN UMAP showing cell subsets annotated by chromatin accessibility features. **(E)** WNN UMAP showing cell subsets annotated by RNA features. **(F)** Batch effect removal by Harmony (RNA), reciprocal LSI (ATAC), and reciprocal PCA (protein) showed integration across viremic, suppressed, and uninfected conditions. **(G–I)** Key epigenetic, transcriptional, and protein markers used to annotate all 15 computationally identified clusters. **(G)** Average normalized and scaled chromatin accessibility (ATAC) in each cell group. **(H)** Average normalized and scaled RNA expression in each cell group. **(I)** Average CLR-normalized and scaled surface protein expression in each cell group.



**Figure S2. Distinct epigenetic, transcriptional, and surface protein profiles of memory CD4<sup>+</sup> T cells were captured during viremia and viral suppression, related to Figure 1.** (A) Differential chromatin accessibility of transcription factor binding motifs, represented in heatmap as comparisons of means in ATAC-seq chromVAR bias-corrected deviations (Z-score) between cell groups. All motifs shown had significantly increased accessibility in the viremic group, by  $P < 0.05$  and mean Z-score difference  $\geq 0.1$ . (B) Differentially expressed genes, represented in heatmap as comparisons of cell group means in normalized and scaled RNA expression. All genes passed  $P < 0.05$ , min.pct  $\geq 0.1$ , and  $\log_2FC \geq 0.15$ . (C) Differentially expressed proteins, represented in heatmap as comparisons of cell group means in DSB-normalized and scaled protein expression. All features passed  $P < 0.05$  and  $\log_2FC \geq 0.25$ . The mean expression of all protein features shown were also tested to be greater than the mean expression of their specific isotype controls ( $Z > 2$ ; two-sample Z-test). For all heatmaps,  $n = 25,778, 56,771, 10,660$  memory CD4<sup>+</sup> T cells in the viremic, viral suppression, and uninfected conditions, respectively. Statistical significance for heatmaps was determined by Wilcoxon rank-sum test for comparisons between each group and all cells in the other two groups. All  $P$  values were FDR-adjusted.

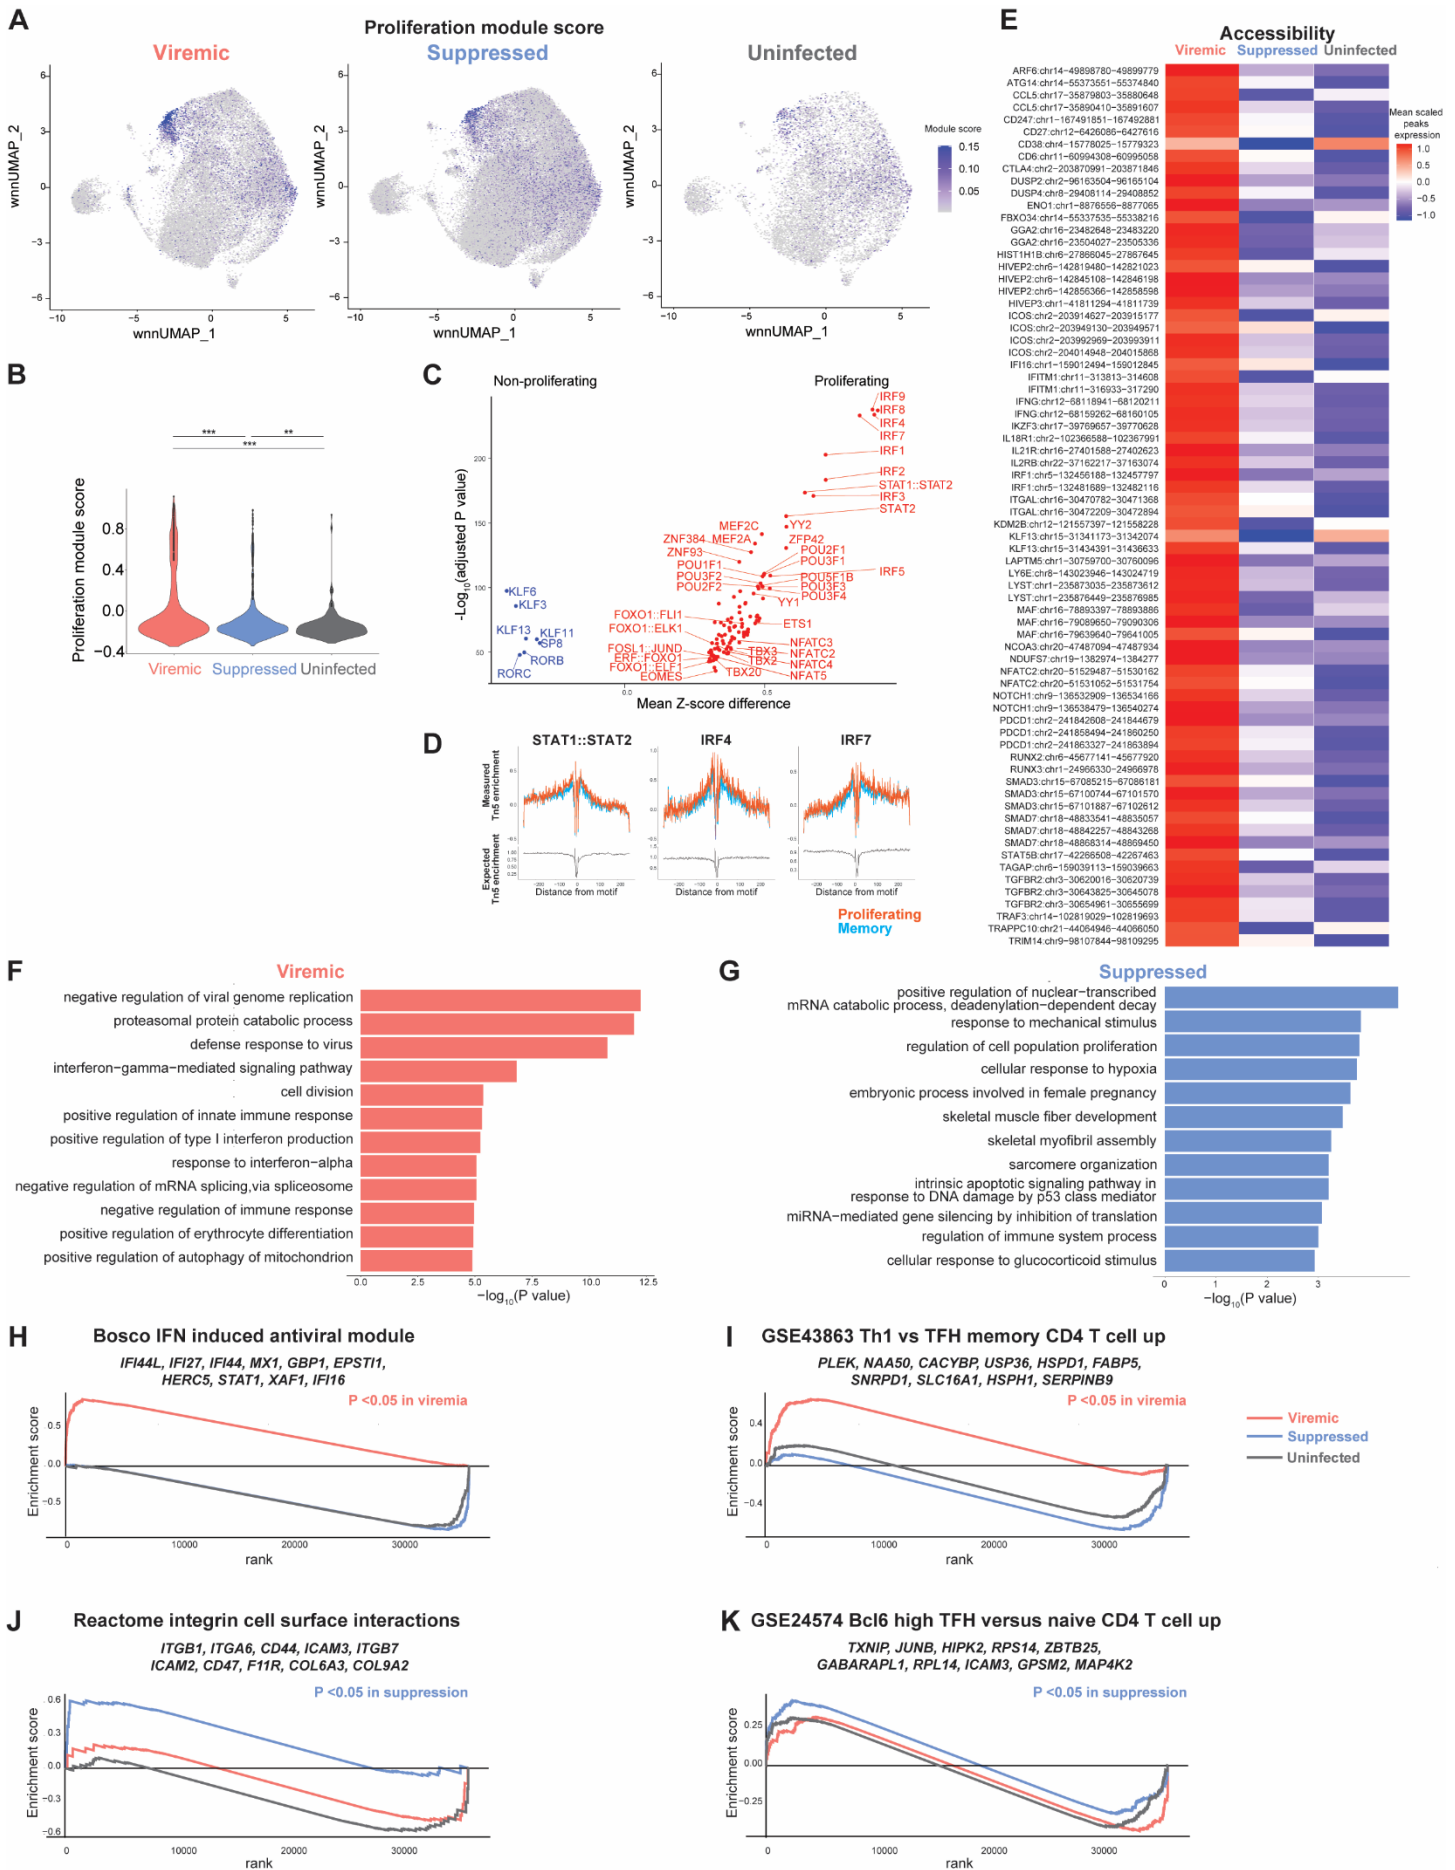

**Figure S3. The epigenetic and transcriptional programs of proliferating cells during HIV-1 infection, related to Figure 1.** (A–B) Proliferation module score in viremia (n = 25,778 cells), viral suppression (56,771 cells), and uninfected conditions (10,660 cells). *P* values were determined by Wilcoxon rank-sum test. (C) Volcano plot indicating transcription factor binding motifs having increased chromatin accessibility as measured by mean differences in chromVAR bias-corrected deviations (Z-score) between cells in the proliferating cluster (red, n = 2,727 cells) and cells not in proliferating cluster (blue, n = 90,482 cells) (FDR-adjusted *P* < 0.05 and mean Z-score difference ≥ 0.3). (D) Transcription factor footprints of STAT1:STAT2, IRF4, IRF7, built using normalized ATAC reads in chromatin accessible peaks called by MACS3, TF-binding sequence motifs from the JASPAR2022 reference database and reference genome hg38. STAT1:STAT2, IRF4, IRF7 binding motifs had greater observed/expected chromatin accessibility in the proliferating cluster than other clusters (FDR-adjusted *P* < 0.05). (E) ATAC peaks (differentially accessible chromatin regions) highly accessible in cells from the proliferating cluster grouped by conditions, represented in heatmap as comparisons of cell group means in normalized and scaled expression of peaks called by MACS3. All features passed *P* < 0.05, min.pct ≥ 0.05, log<sub>2</sub>FC ≥ 0.15 with latent variable = total number of in-peak counts. Statistical significance for all heatmaps was determined by Wilcoxon rank-sum test for comparisons between each group and all cells in the other two groups; all *P* values were FDR-adjusted. (F–G) Top enriched Gene Ontology biological processes (GO:BP) determined using transcriptionally upregulated genes (*P* < 0.05) in the proliferating cluster in viremia (F) and in viral suppression (G). All Gene Ontology pathways passed *P* < 0.01 by Fisher's exact test. (H–K) To identify immune pathways correlated with cells in the proliferating cluster in viremia and viral suppression conditions, all 36,601 genes were ranked by log<sub>2</sub> fold change in normalized gene expression between viremic and suppressed cell groups. Significantly enriched pathways were identified using GSEA with a total of 111,635 reference gene sets from H: hallmark, C2: curated gene sets, and C7: immunologic signature gene sets. \*\* *P* < 0.01, \*\*\* *P* < 0.001.

**A Chromatin accessibility**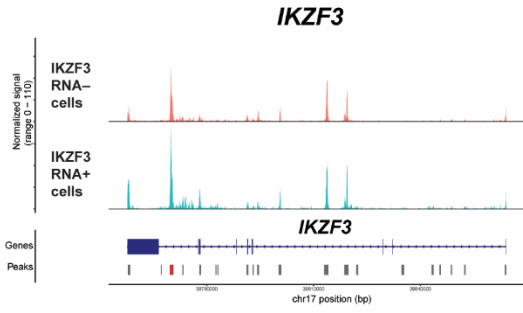**F Chromatin accessibility at CCL5 gene**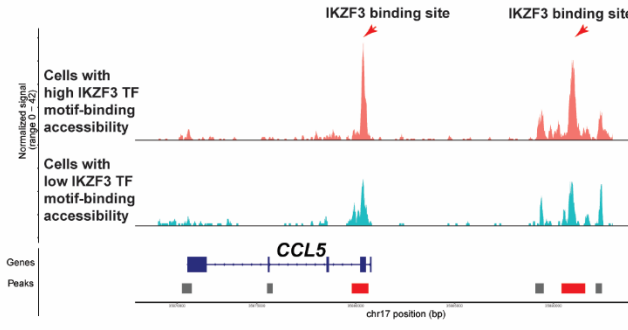**G CCL5 RNA expression**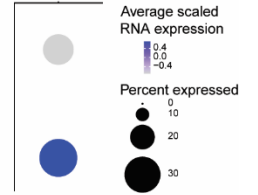**B CCL5**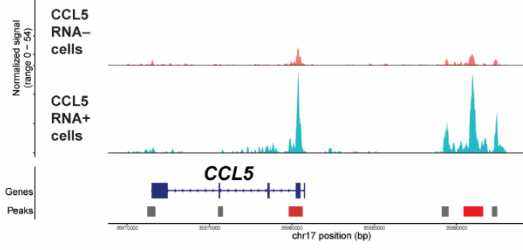**C IFI16**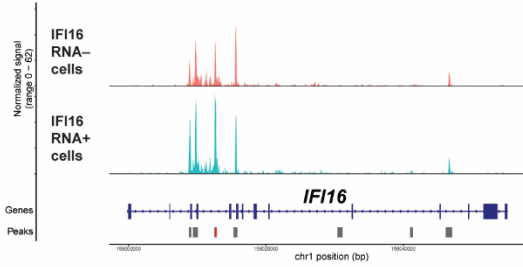**D IFNG**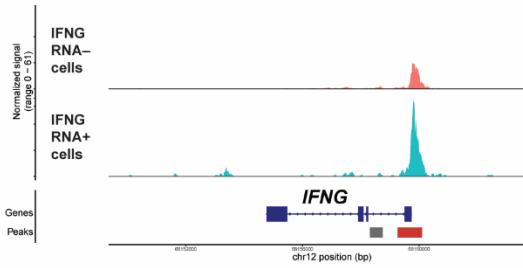**E IL2RB**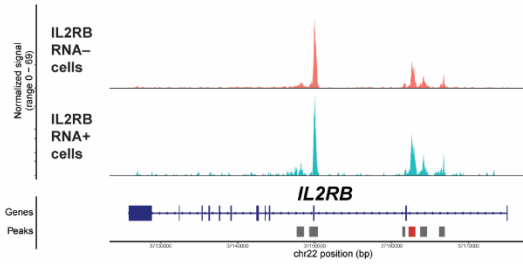

**Figure S4. RNA expression of *IKZF3*, *CCL5*, *IFI16*, *IFNG*, and *IL2RB* are epigenetically regulated, related to Figure 1. (A–E)** Increased chromatin accessibility at gene coordinates highlighted in red (corresponding to significantly differentially accessible peaks identified in Figure 1I) in cells in Proliferating cluster that are (A) *IKZF3*<sup>+</sup> versus *IKZF3*<sup>-</sup>, (B) *CCL5*<sup>+</sup> vs *CCL5*<sup>-</sup>, (C) *IFI16*<sup>+</sup> vs *IFI16*<sup>-</sup>, (D) *IFNG*<sup>+</sup> vs *IFNG*<sup>-</sup>, and (E) *IL2RB*<sup>+</sup> vs *IL2RB*<sup>-</sup>. (F–G) Matching increase in chromatin accessibility at differentially accessible peaks (peaks identified in Figure 1I) at *CCL5* locus (F) and average normalized and scaled *CCL5* expression (G) in proliferating cells having high *IKZF3* transcription factor motif-binding accessibility (chromVAR > 0) versus proliferating cells having low *IKZF3* transcription factor motif-binding accessibility (chromVAR < 0).



**A Viremic**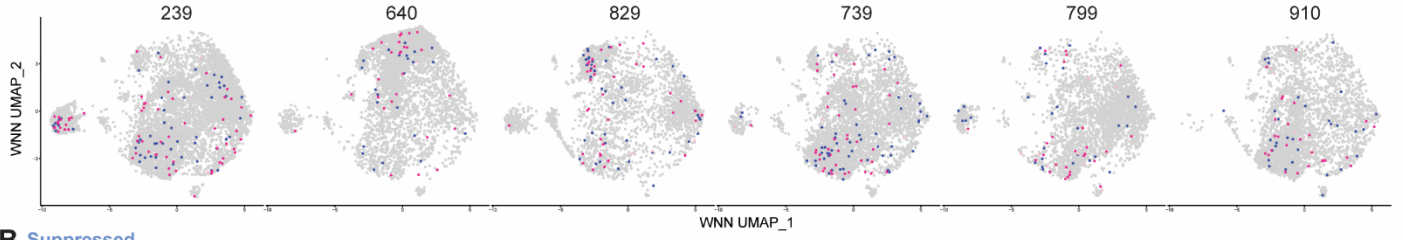**B Suppressed**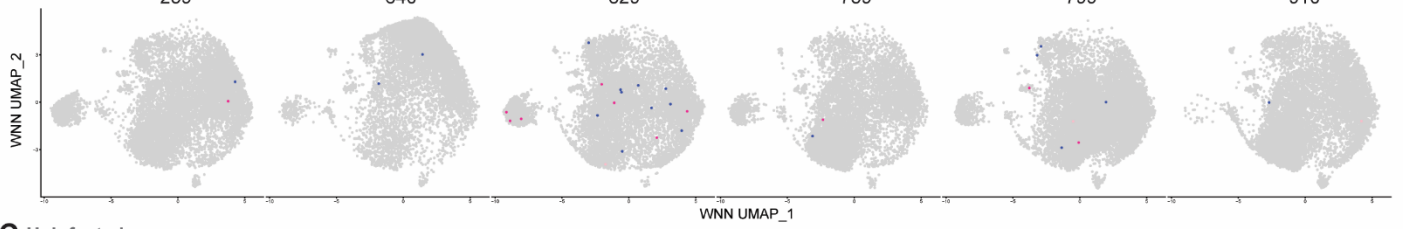**C Uninfected**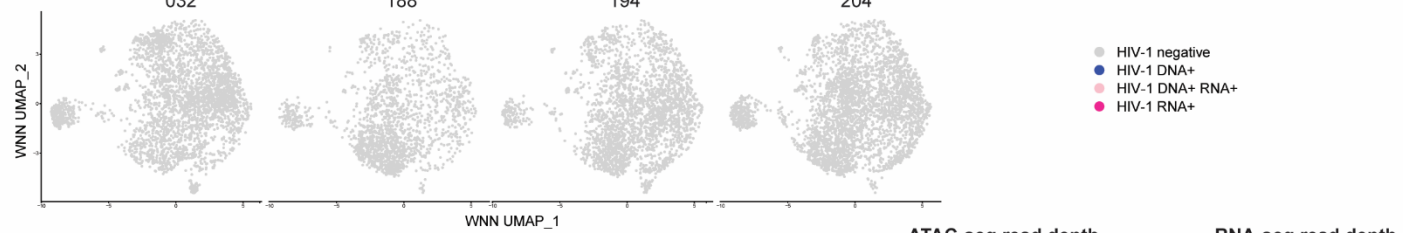

● HIV-1 negative  
 ● HIV-1 DNA+  
 ● HIV-1 DNA+ RNA+  
 ● HIV-1 RNA+

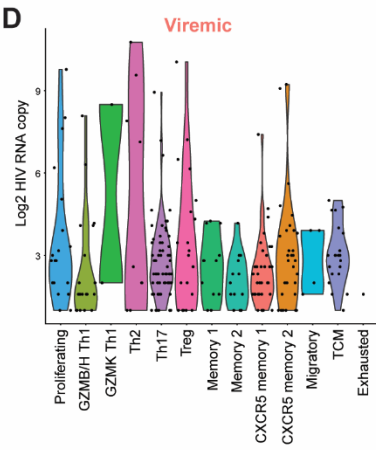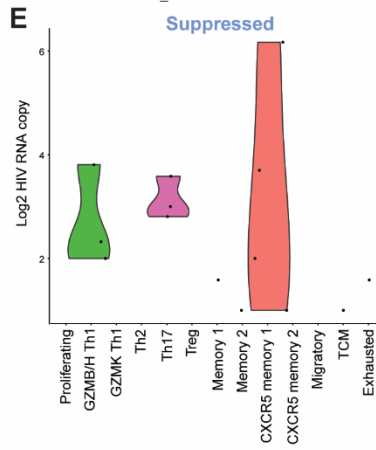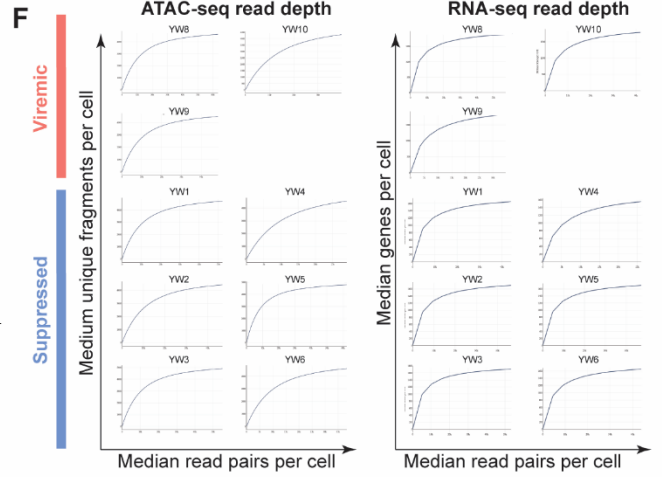**G HIV-1 DNA mapping perparticipant, viremia**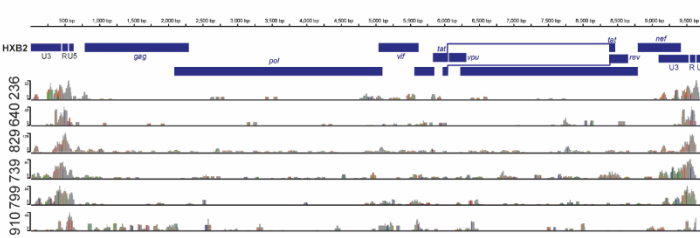**I HIV-1 RNA mapping perparticipant, viremia**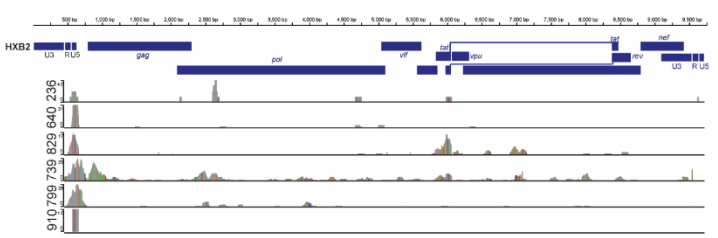**H HIV-1 DNA mapping perparticipant, viral suppression**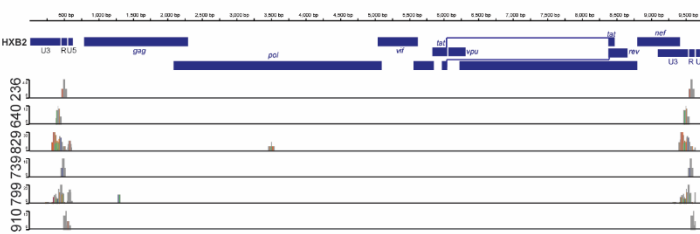**J HIV-1 RNA mapping perparticipant, viral suppression**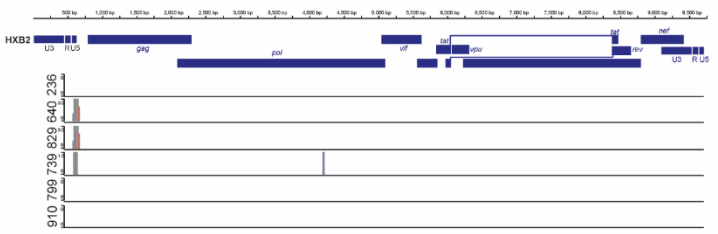

**Figure S5. The HIV-1 reservoir is heterogeneous in each participant, related to Figure 2. (A–C)** Per-participant distribution of HIV-1-infected cells visualized in WNN UMAP projection, in **(A)** viremia, **(B)** viral suppression, and **(C)** uninfected conditions. **(D–E)** Distributions of HIV-1 RNA read copy numbers in HIV-1 RNA<sup>+</sup> cells by cell subset, in **(D)** viremia and **(E)** viral suppression. **(F)** CellRanger sequencing saturation plots per 10x run of ATAC-seq and RNA-seq on viremic and virally suppressed samples. **(G–J)** Integrative genomics viewer (IGV) plots of per-participant HIV-1 DNA<sup>+</sup> reads in viremia **(G)** and in viral suppression **(H)**, and per-participant HIV-1 RNA<sup>+</sup> reads in viremia **(I)** and in viral suppression **(J)**, mapped to HXB2 reference genome and autologous HIV-1 sequences.

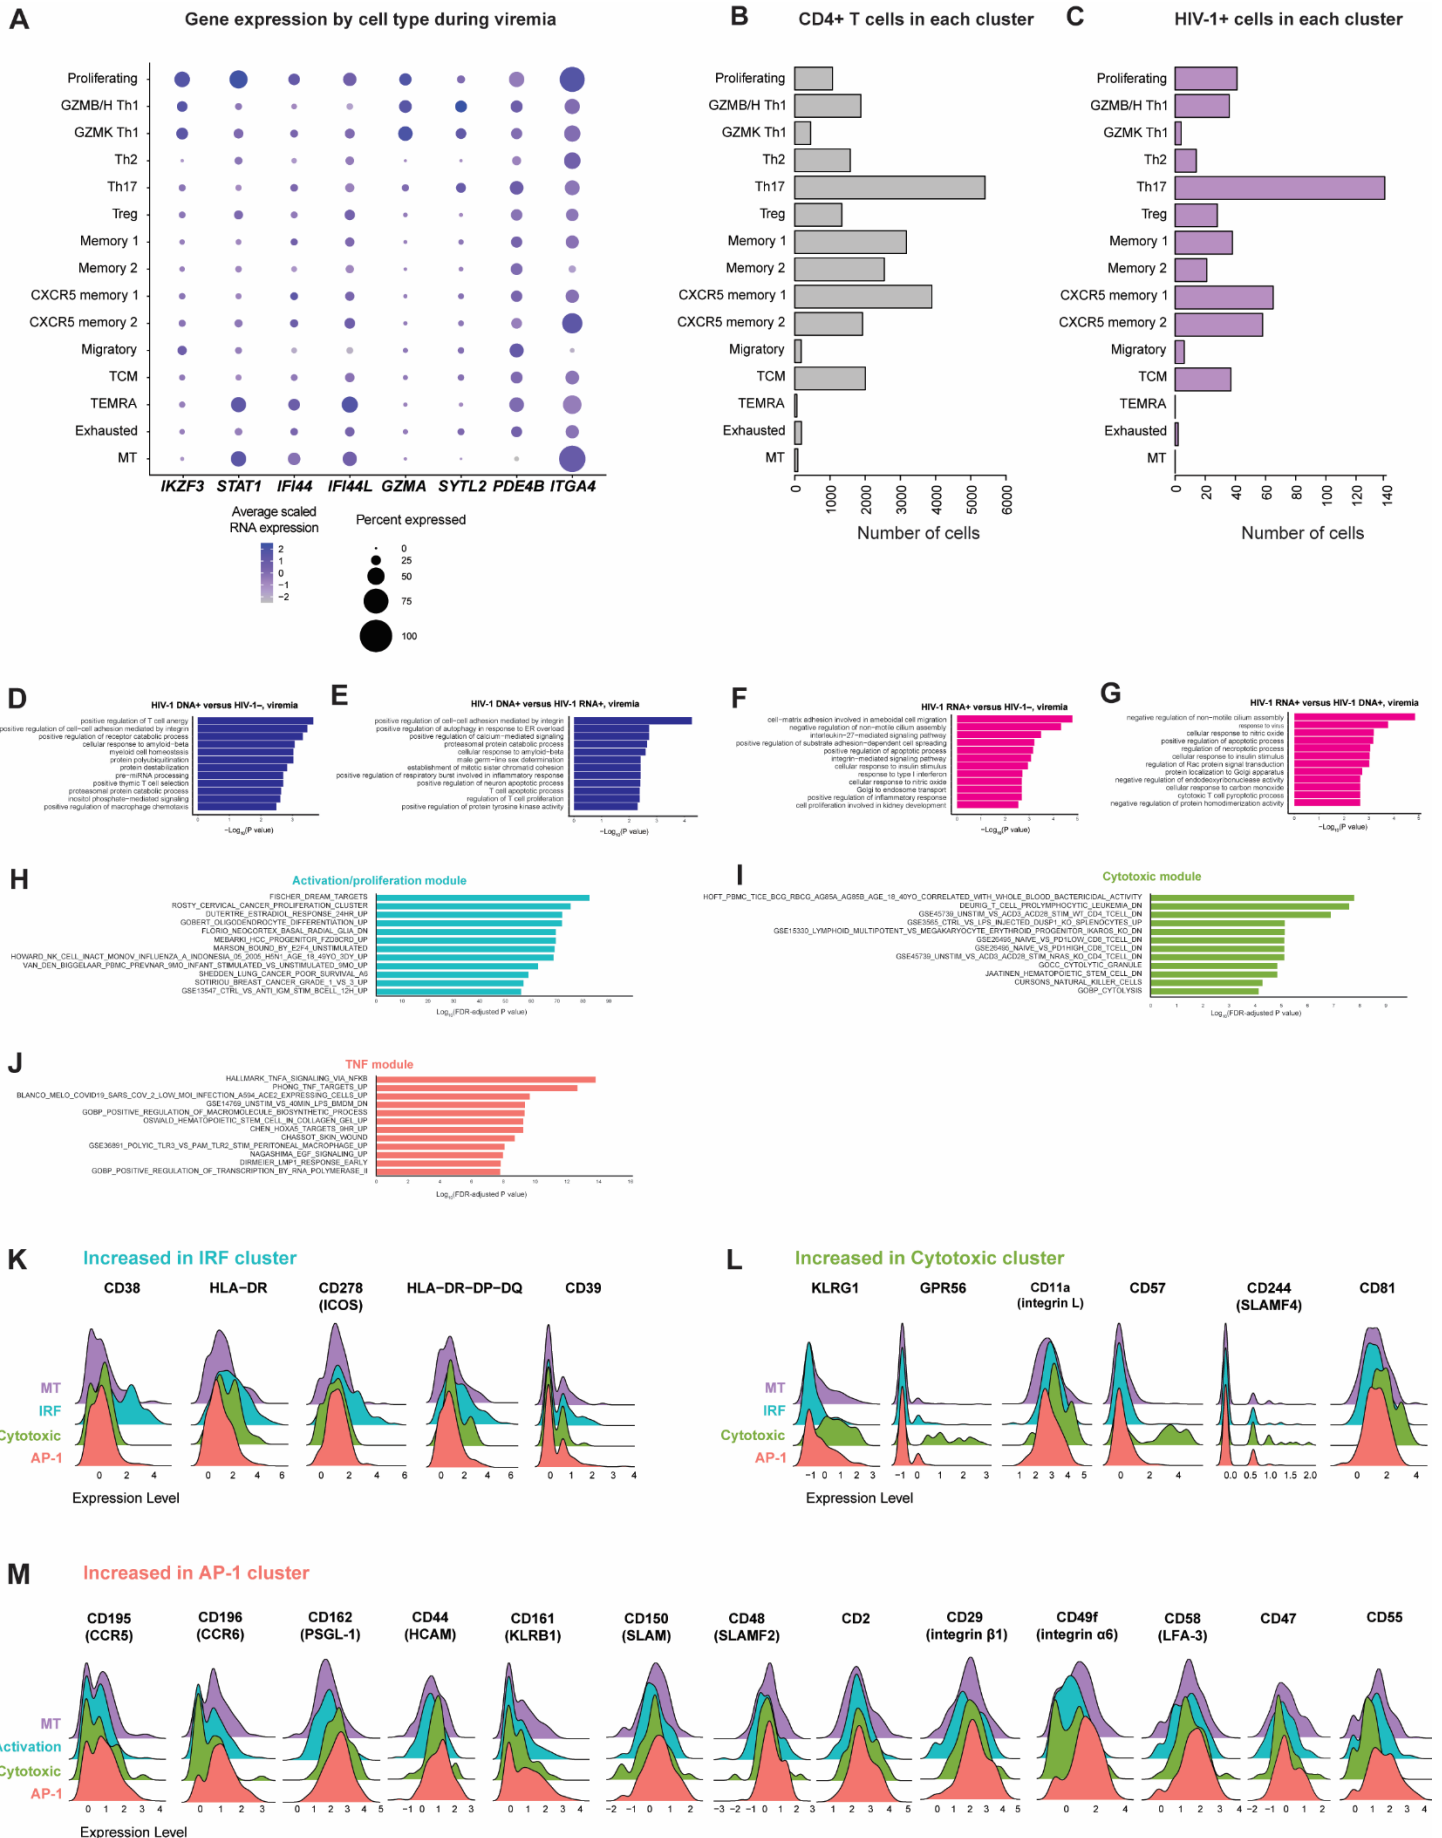

**Figure S6. Transcriptional and protein profile of HIV-1-infected cells, related to Figures 4, 5, and 6. (A)**

Per-cell subset average normalized and scaled RNA expression of eight key genes (that were identified in viremic HIV-1-infected cells) in all cells in viremia. **(B)** Total number of cells identified per cell subset in viremia. **(C)** Total number of HIV-1-infected cells identified per cell subset in viremia. **(D–G)** Top enriched Gene Ontology biological processes (GO:BP) determined using genes upregulated in HIV-1 DNA<sup>+</sup> cells **(D–E)** and in HIV-1 RNA<sup>+</sup> cells **(F–G)**. In the four distinct HIV-1-infected cell states, **(H–J)** Top enriched Gene Ontology immune pathways (MSigDB H, C2, GO, C7 collections) determined using genes identified in the three WGCNA modules: **(H)** Proliferation gene module (gene list shown in Figure 6G), **(I)** Cytotoxic gene module (gene list shown in Figure 6H), and **(K)** AP-1 gene module (gene list shown in Figure 6I). All hypergeometric  $P < 0.05$  were corrected for multiple comparisons using the Benjamini-Hochberg procedure. **(L–N)** Ridge plots of DSB-normalized and scaled protein expression distributions for significantly highly expressed surface proteins (shown in Figure 6F; FDR-adjusted  $P < 0.05$ ) identified, including markers highly expressed in the IRF cluster **(L)**, Cytotoxic cluster **(M)**, and AP-1 cluster **(N)**.

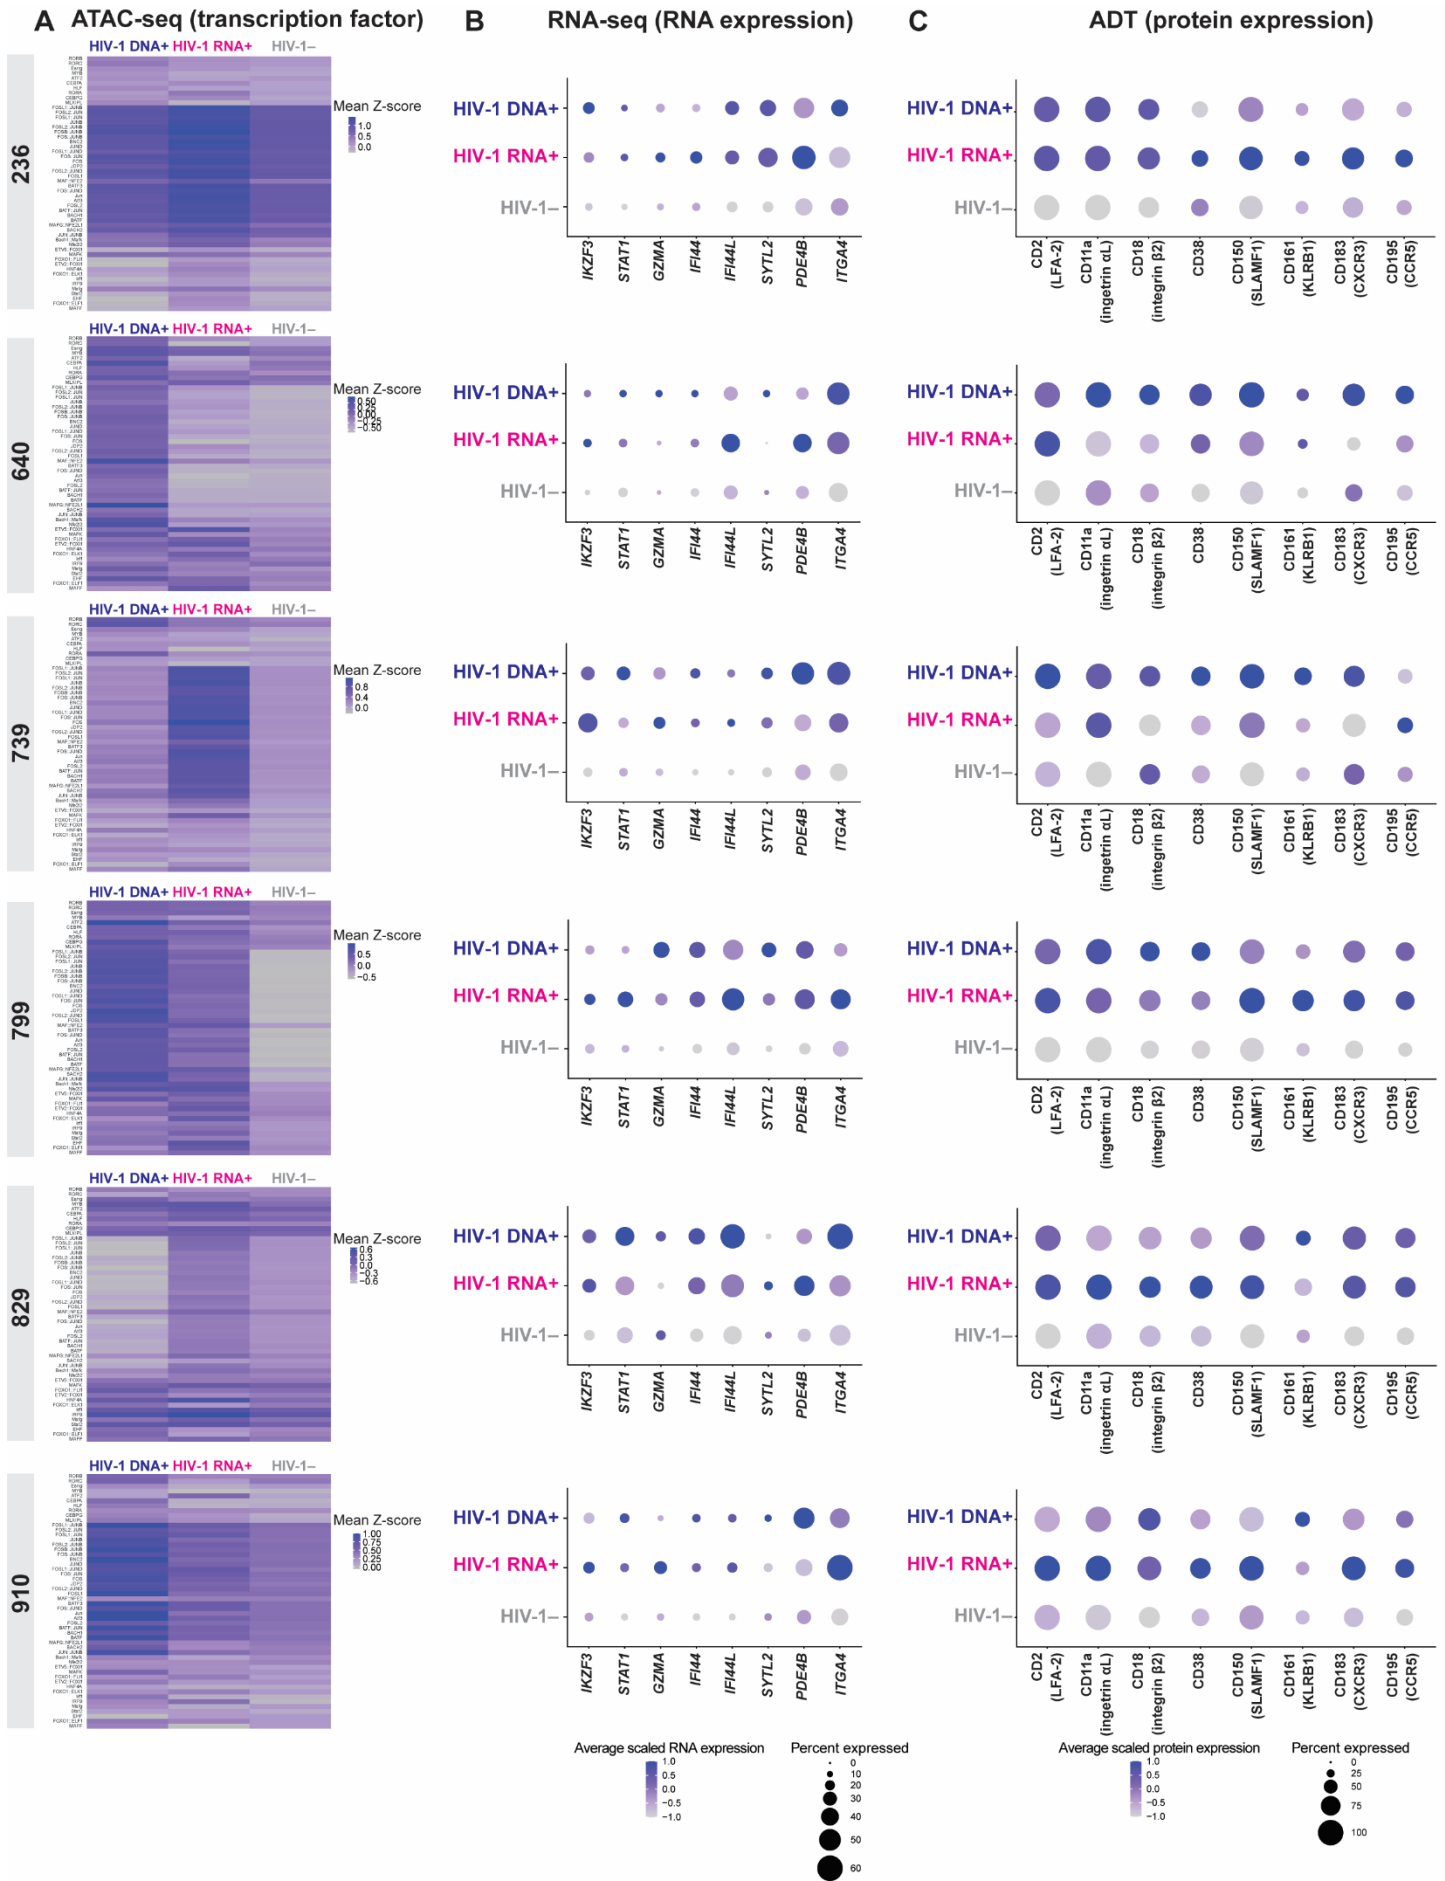

**Figure S7. The epigenetic, transcriptional, and protein profiles of the HIV-1 reservoir do not differ among the six HIV-1<sup>+</sup> participants, related to Figures 3, 4, and 5.** (A) Per-participant global chromatin accessibility of transcription factor binding motifs that were identified to have enriched accessibility in pooled viremic HIV-1 DNA<sup>+</sup> cells or viremic HIV-1 RNA<sup>+</sup> cells (shown in Figure 3F), represented in heatmap as comparisons of group means in chromVAR bias-corrected deviations (Z-score). (B) Per-participant average normalized and scaled RNA expression for eight key genes that were determined to be significantly upregulated in both pooled viremic HIV-1 DNA<sup>+</sup> cells and HIV-1 RNA<sup>+</sup> cells (shown in Figure 4A, 4B). (C) Per-participant average CLR-normalized and scaled protein expression for proteins that were determined to be significantly upregulated in both pooled viremic HIV-1 DNA<sup>+</sup> cells and HIV-1 RNA<sup>+</sup> cells (shown in Figure 5A, 4B). All per-participant comparisons are made between HIV-1 DNA<sup>+</sup> cells, HIV-1 RNA<sup>+</sup> cells, and HIV-1<sup>-</sup> cells. *P* values did not reach statistical significance for differential expression between conditions due of the low number of HIV-1<sup>+</sup> cells captured per-participant (see Table S3 for infected cell count per participant).

**Table S1. Clinical characteristics of study participants, related to Figure 1.**

| Participant ID                | Age | Sex | Ethnicity | ART           | Peak viral load (copies/ml) | Duration since EDDI at viremia (days) | Duration of ART during viral suppression (days) | CD4 count at viremia (/μl) | CD4 count at viral suppression (/μl) |
|-------------------------------|-----|-----|-----------|---------------|-----------------------------|---------------------------------------|-------------------------------------------------|----------------------------|--------------------------------------|
| People living with HIV-1*     |     |     |           |               |                             |                                       |                                                 |                            |                                      |
| 236                           | 22  | M   | Hispanic  | EFV/FTC/TDF   | 7,117,757                   | 24                                    | 431                                             | 625                        | 712                                  |
| 640                           | 26  | M   | Hispanic  | EVG/c/TDF/FTC | 6,023,064                   | 22                                    | 336                                             | 586                        | 772                                  |
| 829                           | 21  | M   | Hispanic  | EFV/TDF/FTC   | 1,205,138                   | 48                                    | 329                                             | 388                        | 796                                  |
| 739                           | 23  | M   | Hispanic  | EFV/TDF/3TC   | 8,604,710                   | 41                                    | 342                                             | 467                        | 821                                  |
| 799                           | 31  | M   | Hispanic  | EFV/TDF/3TC   | 13,313,300                  | 20                                    | 329                                             | 1,203                      | 1,464                                |
| 910                           | 24  | M   | Hispanic  | EFV/AZT/3TC   | 1,257,674                   | 33                                    | 338                                             | 375                        | 371                                  |
| People living without HIV-1** |     |     |           |               |                             |                                       |                                                 |                            |                                      |
| 032                           | 52  | M   | Hispanic  |               |                             |                                       |                                                 |                            |                                      |
| 188                           | 29  | M   | Hispanic  |               |                             |                                       |                                                 |                            |                                      |
| 194                           | 35  | M   | Hispanic  |               |                             |                                       |                                                 |                            |                                      |
| 204                           | 28  | M   | Hispanic  |               |                             |                                       |                                                 |                            |                                      |

3TC, lamivudine; AZT, azidothymidine; /c, cobicistat; EFV, efavirenz; EVG, elvitegravir; FTC, emtricitabine; TDF, tenofovir disoproxil; EDDI, estimated dates of detectable infection.

\*These are the same study participants in the Sabes cohort described in Collora *et al.*, Immunity 2022

\*\*HIV-1 infection status was determined by a point-of-care third-generation HIV immunoassay described in Lama *et al.*, Clinical Infectious Diseases 2021

## Methods S1. DOGMA-seq protocol modifications, related to STAR Methods.

Yulong Wei, Ya-Chi Ho

- Ensure having all required primers prior to starting Step 3 of the multiome protocol.

Step 1–3 of the 10X multiome protocol (10X documentation GC000338 Rev A) should be followed without modification.

### PREAMPLIFICATION PCR (Step 4)

Complete step 4 with only these modification

In step 4.1: Add 1  $\mu$ l of 0.2  $\mu$ M of ADT and HTO primers to the preamplification mix.

1X

50  $\mu$ l P-A Mix

4  $\mu$ l P-A Primer

1  $\mu$ l 0.2  $\mu$ M ADT

1  $\mu$ l 0.2  $\mu$ M HTO

56  $\mu$ L Mastermix per sample

In step 4.3.k Elute beads in 100.5  $\mu$ l of Buffer EB

In step 4.3.o Recover 100  $\mu$ l postamplification product

### ATAC AMPLIFICATION (Step 5)

In step 5.1 Use only 25  $\mu$ l of post amplification product for ATAC sample index PCR.

Adjust sample index PCR mix accordingly:

- Amp Mix: 31.3  $\mu$ l per sample
- Si-PCR Primers: 4.7  $\mu$ l per sample

In step 5.1.b Add 35.6  $\mu$ l sample index PCR mix to 25  $\mu$ l post amplification product for ATAC sample index PCR.

In step 5.1.c Add 1.6  $\mu$ l of sample index N set A for each well.  
Record assignment, pipette mix and centrifuge briefly.

In step 5.2.a Add 37.5  $\mu$ l SPRI select (0.6X) to each sample and mix.  
Incubate for 5 minutes, then place on magnet.  
Transfer 92  $\mu$ l of supernatant to new strip.

In step 5.2.e Add 59.4  $\mu$ l SPRI select (1.55X) to each sample and mix.

### cDNA AMPLIFICATION (Step 5)

Complete without modification.

### To complete the CITE/HTO amplification (not in 10X protocol):

Avoid reusing indices to maintain Unique Dual Indexing.

Prepare a PCR reaction mix:

50  $\mu$ l 2x KAPA mix

2.5  $\mu$ l SI-PCR 10  $\mu$ M – use the indexed ones provided

2.5  $\mu$ l RPxx (TSA family) and D7xx (TSA hashing) mix- provided

10  $\mu$ l H<sub>2</sub>O

65  $\mu$ l Total

Note the index used for each sample (both the SI PCR and the RP/D7 index number).

Add 65  $\mu$ l to 35  $\mu$ l of pre-amplified sample



Cycle samples according to these conditions:

95 °C 3 min  
95 °C 20 sec |  
60 °C 30 sec | 11 total cycles  
72 °C 20 sec |  
72 °C 5 min  
4 °C hold

Expected product is 190 bp in size.

Isolate library using the following 2.0X SPRI protocol:

1. Add 200  $\mu$ l SPRI (2X) to PCR reaction (transfer to 1.5 ml Eppendorf tube if necessary) and mix.
2. Incubate for 10 minutes at room temperature.
3. Place the tube on magnet and wait for solution to clear.
4. Discard the supernatant.
5. Add 400  $\mu$ l of 80% freshly made ethanol without disturbing the pellet.
6. Wait for 30 seconds.
7. Discard ethanol wash.
8. Centrifuge briefly, place the tube on the magnet, and remove residual ethanol.
9. Resuspend beads in 50  $\mu$ l water.
10. Add 100  $\mu$ l SPRI (2X) to PCR reaction (transfer to 1.5ml Eppendorf tube if necessary) and mix.
11. Incubate for 10 minutes at room temperature.
12. Place the tube on the magnet and wait for the solution to clear.
13. Discard the supernatant.
14. Add 400ul of 80% ethanol without disturbing the pellet.
15. Wait for 30 seconds.
16. Discard ethanol wash.
17. Repeat steps 14–16 one additional time for a total of two washes.
18. Centrifuge briefly, place the tube on the magnet, and remove residual ethanol.
19. Air-dry for two minutes (avoid over-drying beads).
20. Remove from magnet and resuspend beads in 20  $\mu$ l water through vigorous pipetting.
21. Incubate at room temperature for 5 minutes.
22. Place the tube on the magnet. Wait for solution to clear.
23. Transfer clear solution to new PCR tubes.
24. Perform Qubit fluorometric quantification. Dilute 1  $\mu$ l accordingly. Examine library size and quantity on Bioanalyzer (or equivalent equipment).

**DOGMA-seq primer sequences:**

| <b>Name</b>    | <b>Sequence</b>                                                        | <b>Notes</b>                      |
|----------------|------------------------------------------------------------------------|-----------------------------------|
| <b>ADT</b>     | CCTTGGCACCCGAGAATT*C*C                                                 | * indicates phosphorothioate      |
| <b>HTO</b>     | GTGACTGGAGTTCAGACGTGTGC*T*C                                            | * indicates phosphorothioate      |
| <b>SIPCR 1</b> | AATGATACGGCGACCACCGAGAagtagcagTCTAC<br>ACTCTTTCCCTACACGACGCTC          | Dual index common primer for both |
| <b>SIPCR 2</b> | AATGATACGGCGACCACCGAGAgcatgaccTCTACA<br>CTCTTTCCCTACACGACGCTC          | Dual index common primer for both |
| <b>SIPCR 3</b> | AATGATACGGCGACCACCGAGAtgcatgctTCTACA<br>CTCTTTCCCTACACGACGCTC          | Dual index common primer for both |
| <b>SIPCR 4</b> | AATGATACGGCGACCACCGAGAgactagcaTCTAC<br>ACTCTTTCCCTACACGACGCTC          | Dual index common primer for both |
| <b>RPX1</b>    | CAAGCAGAAGACGGCATAACGAGATagatcgcaGTG<br>ACTGGAGTTCCTTGGCACCCGAGAATTCCA | Dual index common primer for CITE |
| <b>RPX2</b>    | CAAGCAGAAGACGGCATAACGAGATtgacatagGTG<br>ACTGGAGTTCCTTGGCACCCGAGAATTCCA | Dual index common primer for CITE |
| <b>RPX3</b>    | CAAGCAGAAGACGGCATAACGAGATgatcagacGTG<br>ACTGGAGTTCCTTGGCACCCGAGAATTCCA | Dual index common primer for CITE |
| <b>RPX4</b>    | CAAGCAGAAGACGGCATAACGAGATtcatagcGTGA<br>CTGGAGTTCCTTGGCACCCGAGAATTCCA  | Dual index common primer for CITE |
| <b>D7X1</b>    | CAAGCAGAAGACGGCATAACGAGATgccatcaaGTG<br>ACTGGAGTTCAGACGTGTGC           | Dual index common primer for HTO  |
| <b>D7X2</b>    | CAAGCAGAAGACGGCATAACGAGATtggcattaGTGA<br>CTGGAGTTCAGACGTGTGC           | Dual index common primer for HTO  |
| <b>D7X3</b>    | CAAGCAGAAGACGGCATAACGAGATggcatacaGTG<br>ACTGGAGTTCAGACGTGTGC           | Dual index common primer for HTO  |
| <b>D7X4</b>    | CAAGCAGAAGACGGCATAACGAGATgcgagctGTG<br>ACTGGAGTTCAGACGTGTGC            | Dual index common primer for HTO  |
